# Supplementary material
Source: PubMed Central journal article supplement (PMC4256870)
Supplement: supp_pp.114.247346_247346Supplemental_Material.pdf [file supp_pp.114.247346_247346Supplemental_Material.pdf]

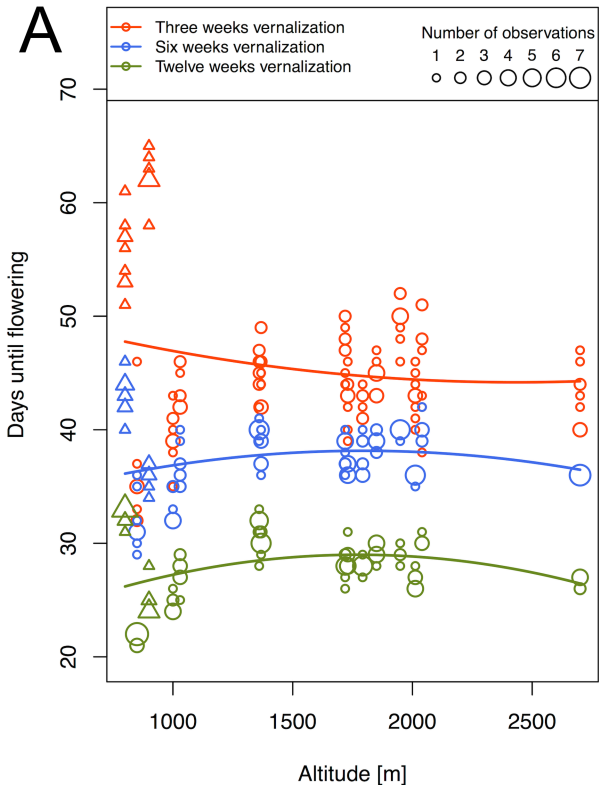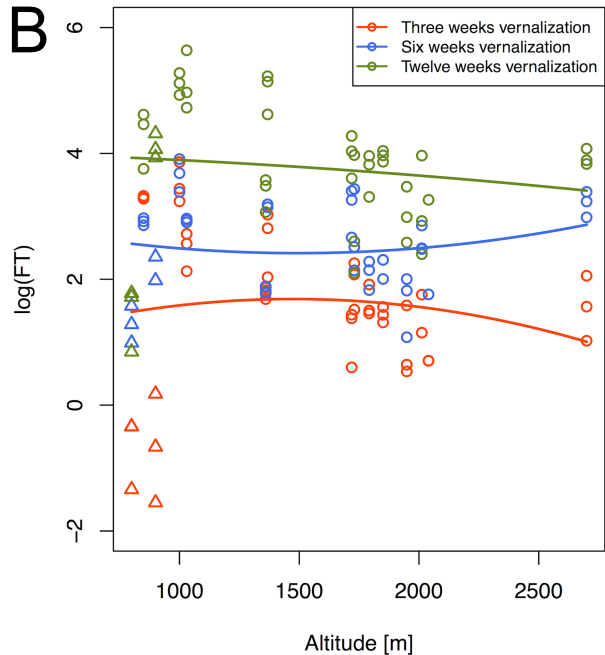

**Figure S1:** Days until flowering and gene expression for 15 *Arabidopsis thaliana* genotypes originating from an altitudinal gradient in the Swiss Alps. Colors denote different vernalization treatments. The 13 genotypes included in all main analyses are plotted in circles, whereas the excluded genotypes E001 and E003 are plotted in triangles. Lines show the predicted regression slope for each vernalization treatment calculated from linear mixed effects models with altitude (linear and quadratic) and treatment as fixed and genotype as random factors. **A:** Days until flowering. Circle and triangle sizes indicate the number of plants flowering on a particular day. **B:** Gene expression of *FT* at late collection time.

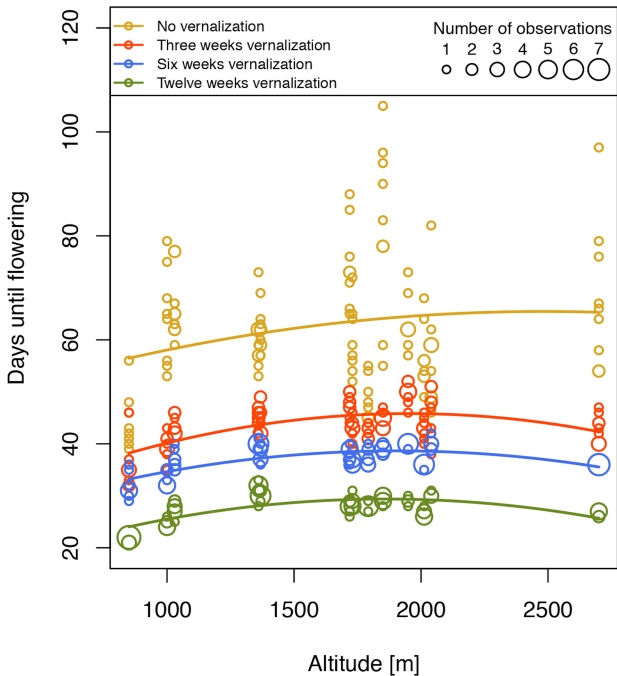

**Figure S2:** Days until flowering for 13 *Arabidopsis thaliana* genotypes originating from an altitudinal gradient in the Swiss Alps. Colors denote different vernalization treatments. Lines show the predicted regression slope for each vernalization treatment calculated from a linear mixed effects model with altitude (linear and quadratic) and treatment as fixed and genotype as random factors. Circle size indicates the number of plants flowering on a particular day.

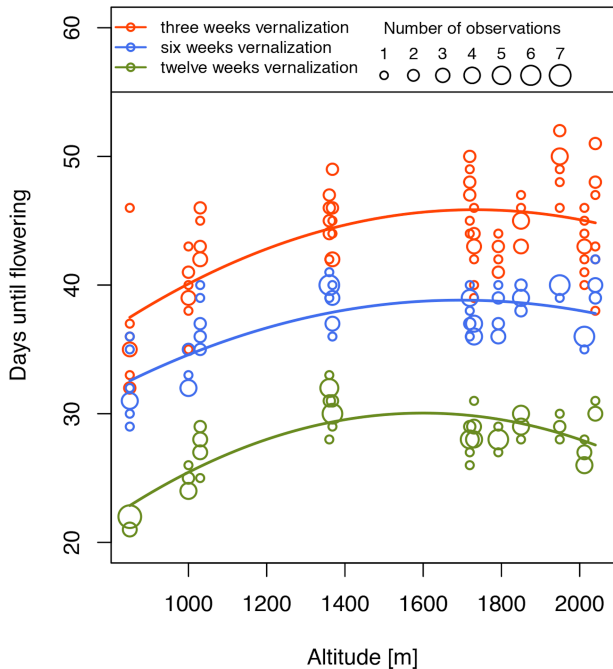

**Figure S3:** Days until flowering for 12 *Arabidopsis thaliana* genotypes originating from an altitudinal gradient in the Swiss Alps. Colors denote different vernalization treatments. Lines show the predicted regression slope for each vernalization treatment calculated from a linear mixed effects model with altitude (linear and quadratic) and treatment as fixed and genotype as random factors. Circle size indicates the number of plants flowering on a particular day.

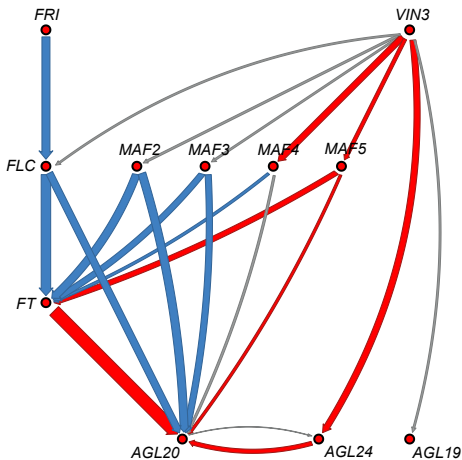

**Figure S4:** Gene regulatory network of the vernalization pathway, whereby edges indicate correlations of the expression of the upstream gene collected at the early collection time (last day of vernalization treatment) with the expression of the downstream gene collected at the late collection time (10 days later, at long day growth conditions). For each genotype the mean of the three biological replica of each treatment and collection time was calculated, so correlations of early expression with late expression could be calculated for each genotype and all three vernalization treatments together. Edge width indicates strength of correlation. Red edges indicate correlations with  $r > 0.1$ ; blue edges with  $r < -0.1$ .

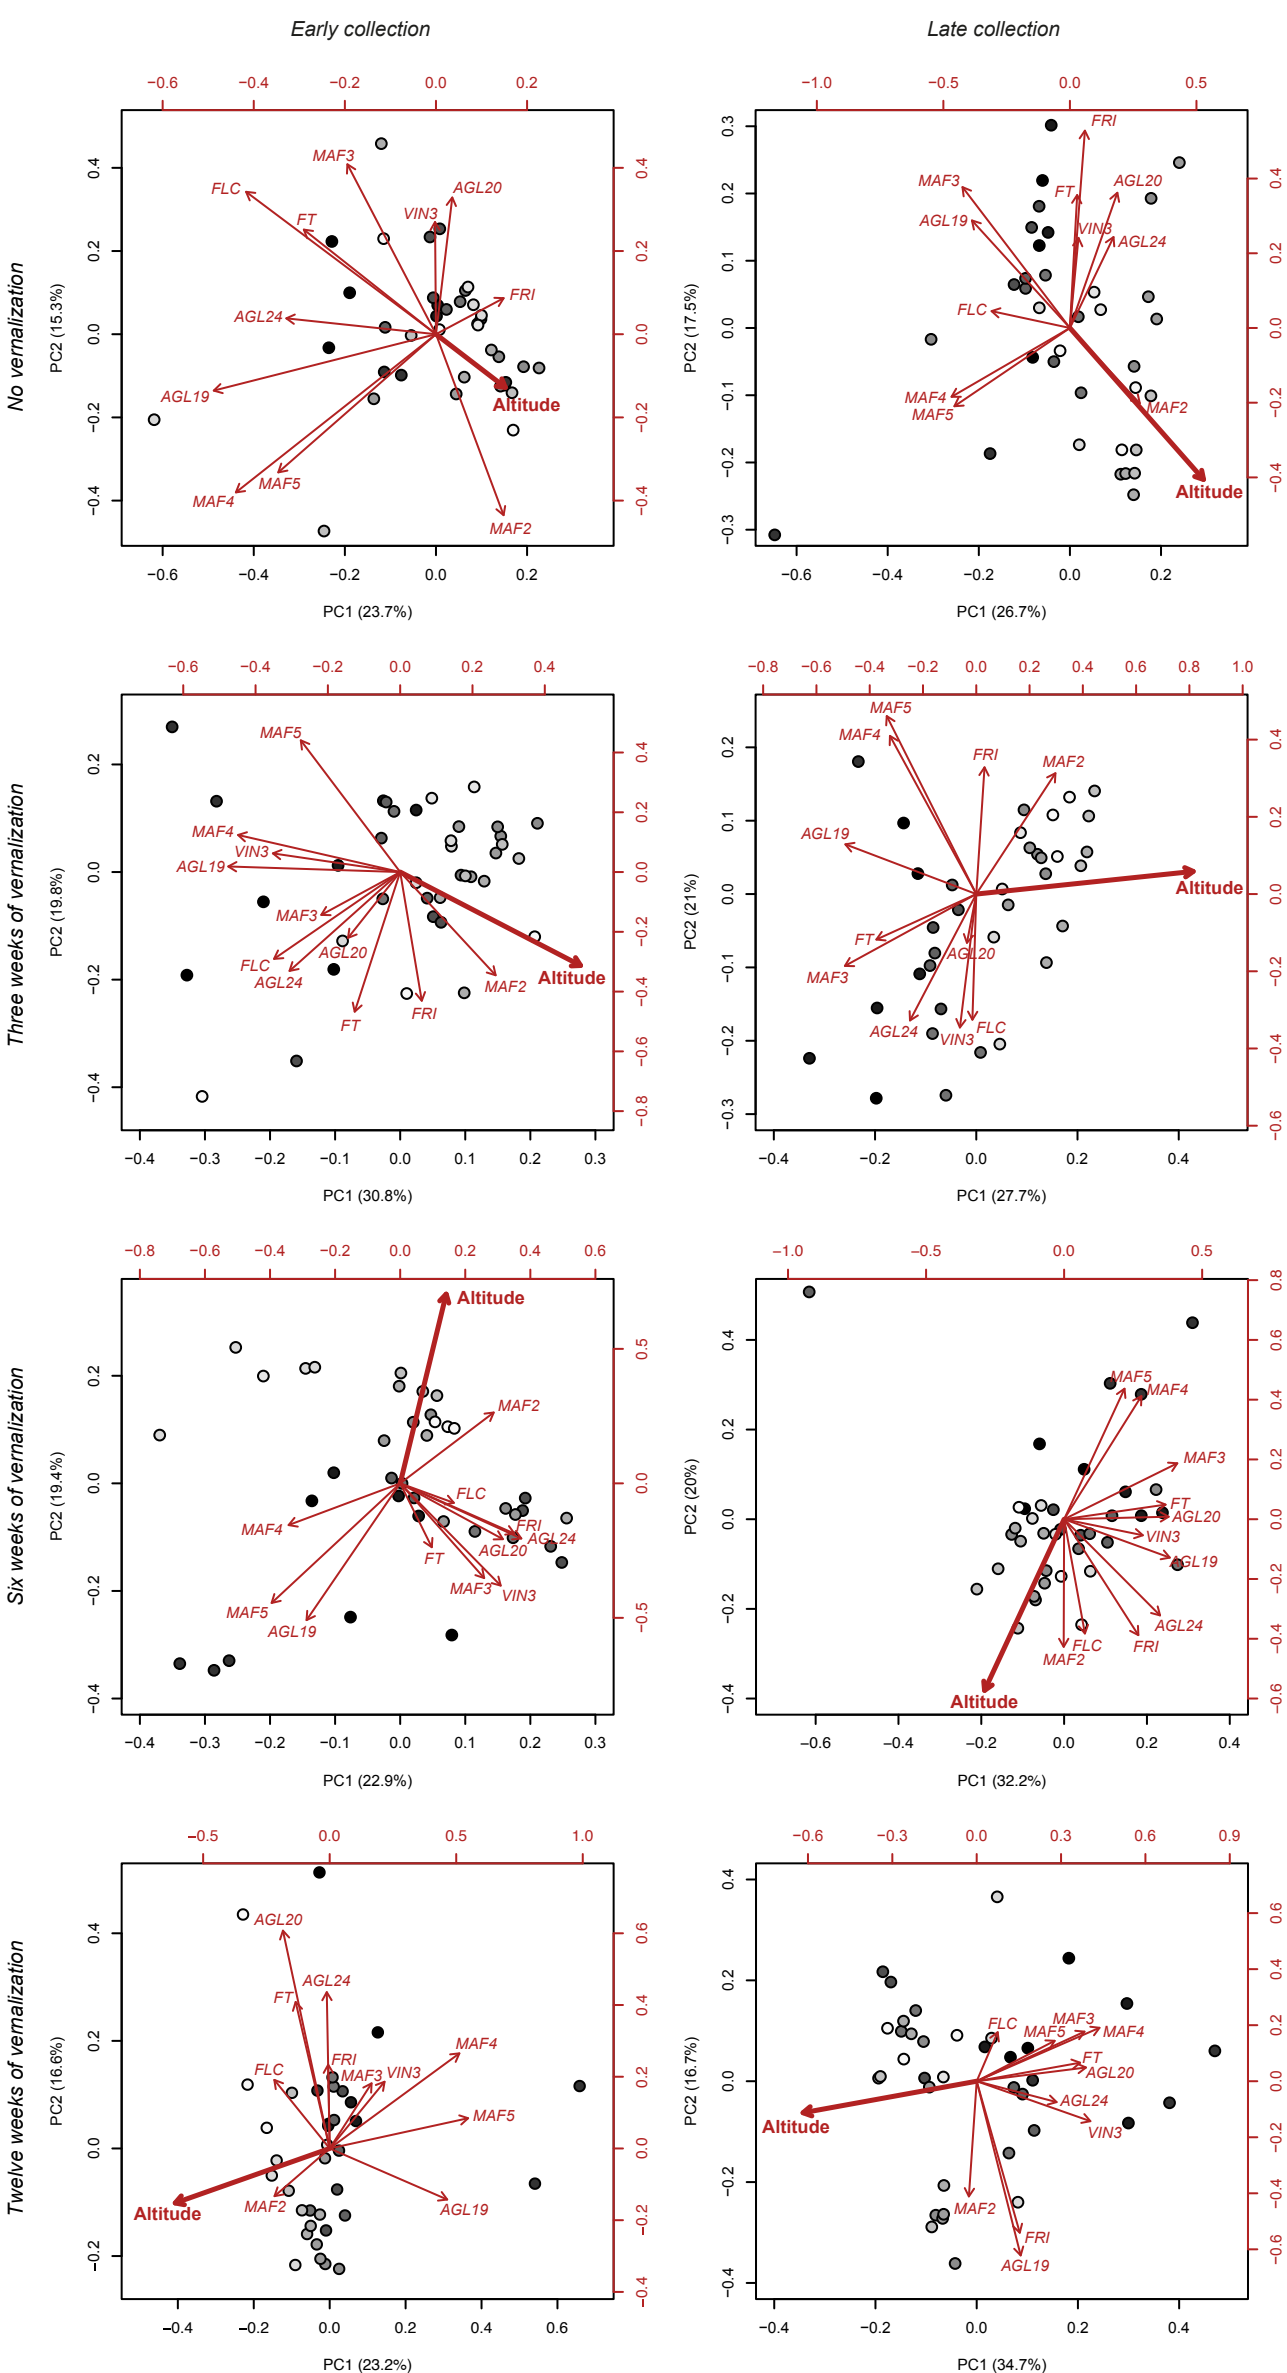

**Figure S5:** PCA's calculated with the gene expression data of 11 genes of the flowering pathway, separately for each vernalization treatment and collection time. Gradation from light to dark indicate altitudinal gradient from high to low. Mostly altitude strongly correlated with one or both principal components.

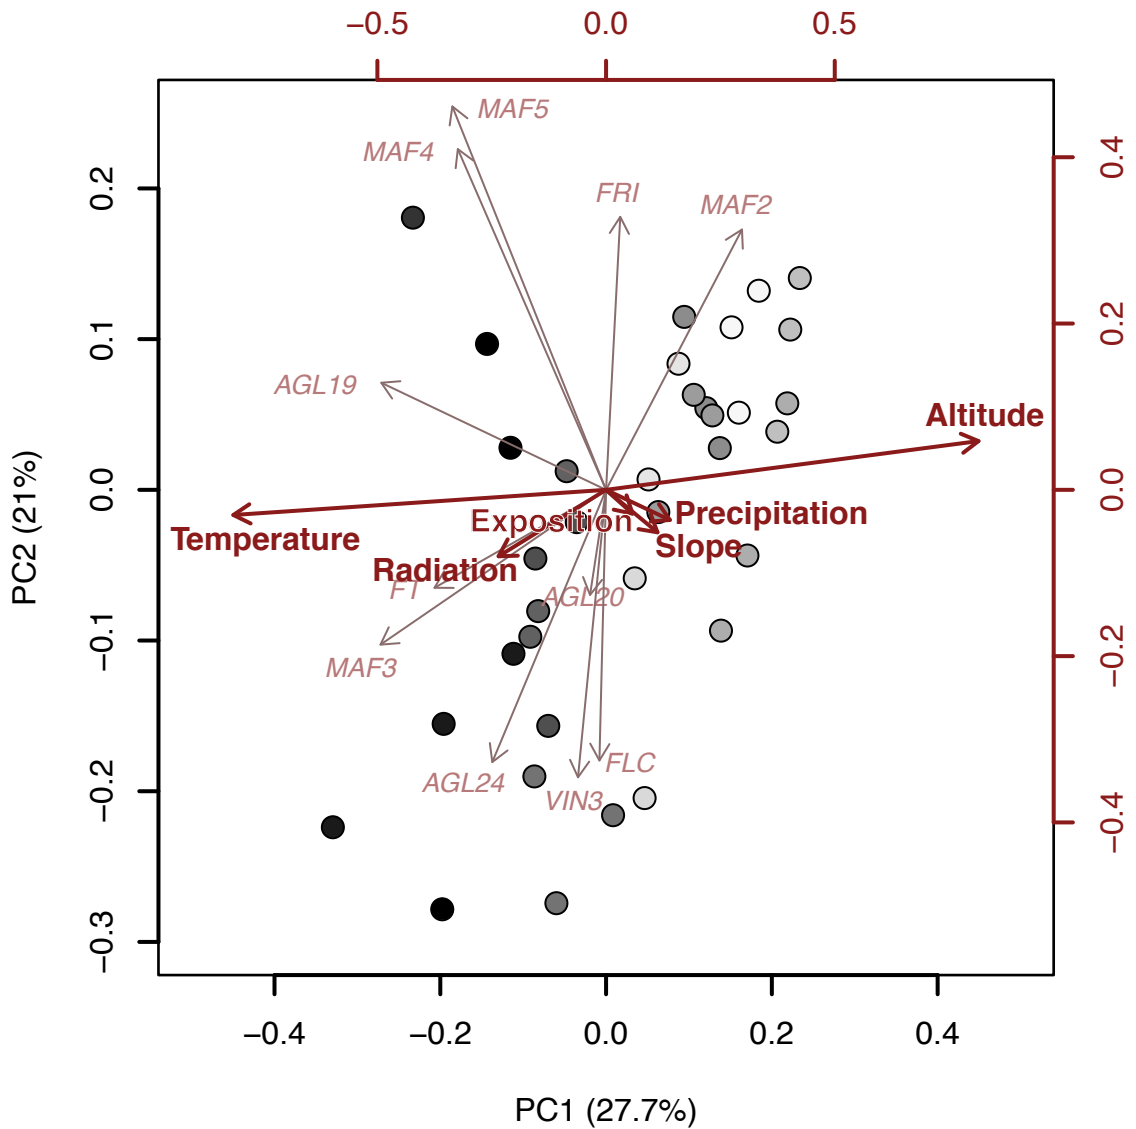

**Figure S6:** PCA calculated with the gene expression data of 11 genes of the flowering pathway for plants vernalized for three treatments from late collection time. Gradation from light to dark indicates altitudinal gradient from high to low. Altitude and environmental variables (average yearly temperature, average yearly precipitation, yearly solar radiation, exposition and slope) were correlated with the principal components.

**Table S1:** Effect of altitude on flowering date, including non-vernalized plants. A linear mixed effect model was used with altitude (linear and quadratic) and vernalization treatment including their interactions as fixed factors and genotypes as random factors. Heteroscedasticity between treatments was accounted for by using the “weights” argument in the lme function.

|                                 | <b>Estimate</b> | <b>SE</b> | <b>T<sub>df</sub><sup>b</sup></b> | <b>p-value</b> |
|---------------------------------|-----------------|-----------|-----------------------------------|----------------|
| Altitude, linear                | 54.975          | 26.131    | 2.104 <sub>398</sub>              | 0.036          |
| Altitude, quadratic             | -21.373         | 26.056    | -0.820 <sub>398</sub>             | 0.413          |
| 3 weeks vernalization           | -18.527         | 1.205     | -15.380 <sub>398</sub>            | <0.001         |
| 6 weeks vernalization           | -25.074         | 1.181     | -21.239 <sub>398</sub>            | <0.001         |
| 12 weeks vernalization          | -34.329         | 1.177     | -29.164 <sub>398</sub>            | <0.001         |
| Altitude (linear) x 3 weeks     | -20.217         | 24.539    | -0.824 <sub>398</sub>             | 0.410          |
| Altitude (quadratic) x 3 weeks  | -18.113         | 24.459    | -0.741 <sub>398</sub>             | 0.459          |
| Altitude (linear) x 6 weeks     | -32.585         | 24.058    | -1.354 <sub>398</sub>             | 0.176          |
| Altitude (quadratic) x 6 weeks  | -9.538          | 23.978    | -0.398 <sub>398</sub>             | 0.691          |
| Altitude (linear) x 12 weeks    | -35.685         | 23.986    | -1.488 <sub>398</sub>             | 0.138          |
| Altitude (quadratic) x 12 weeks | -11.697         | 23.908    | -0.489 <sub>398</sub>             | 0.625          |

<sup>b</sup>T-values and degrees of freedom

**Table S2:** Effect of altitude on flowering date of vernalized plants without the genotype from the highest altitude, E012. A linear mixed effect model was used with altitude (linear and quadratic) and vernalization treatment including their interactions as fixed factors and genotypes as random factors. Heteroscedasticity between treatments was accounted for by using the “weights” argument in the lme function.

|                                 | <b>Estimate</b> | <b>SE</b> | <b>T<sub>df</sub><sup>b</sup></b> | <b>P</b> |
|---------------------------------|-----------------|-----------|-----------------------------------|----------|
| Altitude, linear                | 42.087          | 9.733     | 4.324 <sub>271</sub>              | <0.001   |
| Altitude, quadratic             | -21.987         | 9.774     | -2.250 <sub>271</sub>             | 0.025    |
| 6 weeks vernalization           | -6.506          | 0.321     | -20.288 <sub>271</sub>            | <0.001   |
| 12 weeks vernalization          | -15.764         | 0.305     | -51.650 <sub>271</sub>            | <0.001   |
| Altitude (linear) x 6 weeks     | -12.156         | 5.468     | -2.223 <sub>271</sub>             | 0.027    |
| Altitude (quadratic) x 6 weeks  | 4.082           | 5.467     | 0.747 <sub>271</sub>              | 0.456    |
| Altitude (linear) x 12 weeks    | -15.362         | 5.200     | -2.954 <sub>271</sub>             | 0.003    |
| Altitude (quadratic) x 12 weeks | -4.179          | 5.194     | -0.805 <sub>271</sub>             | 0.422    |

<sup>b</sup>T-values and degrees of freedom



**Table S3:** Effect of altitude on flowering date of vernalized plants including genotypes E001 and E003. A linear mixed effect model was used with altitude (linear and quadratic) and vernalization treatment including their interactions as fixed factors and genotypes as random factors. Heteroscedasticity between treatments was accounted for by using the “weights” argument in the lme function.

|                                 | <b>Estimate</b> | <b>SE</b> | <b>T<sub>df</sub><sup>b</sup></b> | <b>P</b> |
|---------------------------------|-----------------|-----------|-----------------------------------|----------|
| Altitude, linear                | -22.448         | 16.562    | -1.355 <sub>338</sub>             | 0.176    |
| Altitude, quadratic             | 8.007           | 16.525    | 0.485 <sub>338</sub>              | 0.628    |
| 6 weeks vernalization           | -8.278          | 0.511     | -16.190 <sub>338</sub>            | <0.001   |
| 12 weeks vernalization          | -17.728         | 0.504     | -35.208 <sub>338</sub>            | <0.001   |
| Altitude (linear) x 6 weeks     | 30.414          | 9.544     | 3.187 <sub>338</sub>              | 0.002    |
| Altitude (quadratic) x 6 weeks  | -20.149         | 9.485     | -2.124 <sub>338</sub>             | 0.034    |
| Altitude (linear) x 12 weeks    | 32.765          | 9.399     | 3.486 <sub>338</sub>              | <0.001   |
| Altitude (quadratic) x 12 weeks | -25.635         | 9.345     | -2.743 <sub>338</sub>             | 0.006    |

<sup>b</sup>T-values and degrees of freedom

**Table S4:** *Effect of yearly average temperature on flowering date of vernalized plants.* A linear mixed effect model was used with temperature (linear and quadratic) and vernalization treatment including their interactions as fixed factors and genotypes as random factors. Heteroscedasticity between treatments was accounted for by using the “weights” argument in the lme function.

|                                    | <b>Estimate</b> | <b>SE</b> | <b>T<sub>df</sub><sup>b</sup></b> | <b>P</b> |
|------------------------------------|-----------------|-----------|-----------------------------------|----------|
| Temperature, linear                | -30.990         | 9.873     | -3.139 <sub>292</sub>             | 0.002    |
| Temperature, quadratic             | -33.743         | 9.837     | -3.430 <sub>292</sub>             | <0.001   |
| 6 weeks vernalization              | -6.549          | 0.306     | -21.414 <sub>292</sub>            | <0.001   |
| 12 weeks vernalization             | -15.799         | 0.292     | -54.072 <sub>292</sub>            | <0.001   |
| Temperature (linear) x 6 weeks     | 8.632           | 5.358     | 1.611 <sub>292</sub>              | 0.108    |
| Temperature (quadratic) x 6 weeks  | 7.957           | 5.327     | 1.494 <sub>292</sub>              | 0.136    |
| Temperature (linear) x 12 weeks    | 10.860          | 5.110     | 2.125 <sub>292</sub>              | 0.034    |
| Temperature (quadratic) x 12 weeks | 5.598           | 5.092     | 1.099 <sub>292</sub>              | 0.272    |

<sup>b</sup>T-value and degrees of freedom

**Table S5:** Genes examined and primers used in this study. Primer efficiency was calculated using LinReg. AL = Amplicon length (bp)

| <b>Gene</b>       | <b>Gene ID</b> | <b>AL</b> | <b>Primer forward</b>      | <b>Primer reverse</b>   | <b>Probe</b> | <b>Efficiency</b> |
|-------------------|----------------|-----------|----------------------------|-------------------------|--------------|-------------------|
| <i>ACT2*</i>      | AT3G18780      | 74        | TTCCGCTCTTTCTTTCCAAG       | CCATTGTCACACACGATTGG    | 102          | 1.969             |
| <i>PDF2*</i>      | AT1G13320      | 84        | ATTCCGATAGTCGACCAAGC       | AACATCAACATCTGGGTCTTCA  | 22           | 1.842             |
| <i>SAM2*</i>      | AT4G01850      | 139       | CTCTAATCGCCGCAGCTT         | TGCTATCAGGGTCTTGCTCA    | 148          | 1.796             |
| <i>UBC9*</i>      | AT4G27960      | 84        | CATCTTGAAGGAGCAGTGGAG      | GGGTTTGGATCCGTTAACAA    | 108          | 1.815             |
| <i>AGL19</i>      | AT4G22950      | 75        | ACCGAAGCTTGAGCAGGATA       | CCTCTGCCTTCAACTTCTCAAT  | 142          | 1.782             |
| <i>AGL20/SOC1</i> | AT2G45660      | 62        | CAAACCCTTTTAGCCAATCG       | GAGTTTGGCCCTCACCA       | 143          | 1.636             |
| <i>AGL24</i>      | AT4G24540      | 74        | AGCCGTGTGTCTGAAAAGAAG      | AATTCCGATCCCCGTTTCT     | 136          | 1.525             |
| <i>FLC</i>        | AT5G10140      | 60        | GACTGCCCTCTCCGTGACTA       | TTCTCAACAAGCTTCAACATGAG | 142          | 1.627             |
| <i>FRI</i>        | AT4G00650      | 142       | CAGTCACCGCTGGCATTTA        | CCAAGCTAACAATTTGCTCTTTG | 121          | 1.776             |
| <i>FT</i>         | AT1G65480      | 70        | GGTGGAGAAGACCTCAGGAA       | GGTTGCTAGGACTTGGAACATC  | 138          | 1.738             |
| <i>MAF1</i>       | AT1G77080      | 60        | TGCCTCCGAAAACCTCTATG       | GGCTTGAACAGCGCTTCTAT    | 69           | 1.925             |
| <i>MAF2</i>       | AT5G65050      | 130       | GGCTCCGAAAACCTCTACAA       | GAGTGGCAGATAATTCCGAG    | 16           | 1.987             |
| <i>MAF3</i>       | AT5G65060      | 96        | ACAGAACTAATGATGGAGGATATGAA | CTTCTTCCCCACCTGGCTA     | 7            | 1.721             |
| <i>MAF4</i>       | AT5G65070      | 91        | TGAAGACCCATCAAGAGAAGG      | GACTTCTTCATCTTCCCCATCTT | 146          | 1.639             |
| <i>MAF5</i>       | AT5G65080      | 117       | TCCACCGGCAAACCTCTACA       | CTGAGTTTTGTCTTCAAGATCC  | 101          | 1.800             |
| <i>VIN3</i>       | AT5G57380      | 68        | CGCGTATTGCGGTAAAGATAA      | TCTCTTTCGCCACCTTCACT    | 67           | 1.579             |

\* these genes were used as reference genes, although *SAM2* had to be excluded due to instable expression.

**Table S6:** Effect of (logarithmic) gene expression on flowering time separately for early and late collection time, including genotypes E001 and E003. Linear mixed effects models were used with genes included as fixed factors and genotypes as random factors. Significant gene expression effects are shown in bold.

| Gene         | Early Collection |              |                              |                  |                | Late Collection |              |                              |                  |                |
|--------------|------------------|--------------|------------------------------|------------------|----------------|-----------------|--------------|------------------------------|------------------|----------------|
|              | Estimate         | SE           | T <sub>df</sub> <sup>b</sup> | P                | P <sup>c</sup> | Estimate        | SE           | T <sub>df</sub> <sup>b</sup> | P                | P <sup>c</sup> |
| <i>AGL19</i> | <b>-3.598</b>    | <b>0.539</b> | <b>-6.672</b> <sub>102</sub> | <b>&lt;0.001</b> | <b>**</b>      | <b>-3.108</b>   | <b>0.569</b> | <b>-5.465</b> <sub>96</sub>  | <b>&lt;0.001</b> | <b>*</b>       |
| <i>FLC</i>   | <b>2.516</b>     | <b>0.590</b> | <b>4.266</b> <sub>102</sub>  | <b>&lt;0.001</b> | <b>.</b>       | <b>1.957</b>    | <b>0.316</b> | <b>6.201</b> <sub>96</sub>   | <b>&lt;0.001</b> |                |
| <i>AGL20</i> | <b>-1.309</b>    | <b>0.477</b> | <b>-2.742</b> <sub>102</sub> | <b>0.007</b>     |                | -0.525          | 0.485        | -1.083 <sub>96</sub>         | 0.281            |                |
| <i>MAF4</i>  | <b>6.211</b>     | <b>2.832</b> | <b>2.193</b> <sub>102</sub>  | <b>0.031</b>     | <b>.</b>       | <b>12.504</b>   | <b>2.977</b> | <b>4.200</b> <sub>96</sub>   | <b>&lt;0.001</b> | <b>*</b>       |
| <i>MAF2</i>  | <b>1.525</b>     | <b>0.710</b> | <b>2.149</b> <sub>102</sub>  | <b>0.034</b>     |                | -0.805          | 0.760        | -1.058 <sub>96</sub>         | 0.293            |                |
| <i>VIN3</i>  | 1.888            | 1.065        | 1.773 <sub>102</sub>         | 0.079            | <b>.</b>       | -0.303          | 0.511        | -0.592 <sub>96</sub>         | 0.555            |                |
| <i>AGL24</i> | 1.259            | 0.928        | 1.356 <sub>102</sub>         | 0.178            |                | -1.384          | 0.881        | -1.572 <sub>96</sub>         | 0.119            |                |
| <i>MAF3</i>  | 0.348            | 0.446        | 0.781 <sub>102</sub>         | 0.437            |                | -0.013          | 0.362        | -0.037 <sub>96</sub>         | 0.971            |                |
| <i>MAF5</i>  | -1.086           | 2.175        | -0.500 <sub>102</sub>        | 0.618            |                | -2.035          | 1.242        | -1.638 <sub>96</sub>         | 0.105            |                |
| <i>FRI</i>   | -0.610           | 1.256        | -0.486 <sub>102</sub>        | 0.628            |                | 2.734           | 1.367        | 2.001 <sub>96</sub>          | 0.048            |                |
| <i>FT</i>    | 0.127            | 1.004        | 0.126 <sub>102</sub>         | 0.900            |                | <b>-1.523</b>   | <b>0.389</b> | <b>-3.917</b> <sub>96</sub>  | <b>&lt;0.001</b> | <b>*</b>       |

<sup>b</sup>T-value and degrees of freedom

<sup>c</sup>significant P-values of linear mixed effects models where the mean gene expression of each gene (per genotype and treatment) was tested against the mean flowering time of each treatment, separately for the two collection times. \*: P-value < 0.05; \*\*: P-value < 0.01

**Table S7:** Correlation coefficients between gene regulation of the vernalization pathway and flowering time including genotypes E001 and E003.

Gene regulatory network analysis revealed that several edges (Pearson correlations between gene pairs) of the vernalization pathway correlated significantly with flowering time in vernalized plants, indicating that flowering time can be explained by the regulation of genes analysed in this study.

| Edge               | Correlation | T <sub>df</sub> <sup>b</sup> | P      | P adj. <sup>c</sup> |
|--------------------|-------------|------------------------------|--------|---------------------|
| <i>AGL20-AGL24</i> | -0.667      | -5.740 <sub>41</sub>         | <0.001 | ***                 |
| <i>FT-AGL20</i>    | -0.562      | -4.349 <sub>41</sub>         | <0.001 | ***                 |
| <i>VIN3-FLC</i>    | -0.479      | -3.493 <sub>41</sub>         | 0.001  | **                  |
| <i>VIN3-AGL19</i>  | -0.449      | -3.218 <sub>41</sub>         | 0.003  | *                   |
| <i>FLC-FT</i>      | 0.383       | 2.654 <sub>41</sub>          | 0.011  | *                   |
| <i>MAF3-AGL20</i>  | 0.326       | 2.123 <sub>38</sub>          | 0.040  | ns                  |
| <i>VIN3-MAF3</i>   | 0.320       | 2.080 <sub>38</sub>          | 0.044  | ns                  |
| <i>MAF3-FT</i>     | -0.239      | -1.514 <sub>38</sub>         | 0.138  | ns                  |
| <i>MAF2-AGL20</i>  | -0.229      | -1.509 <sub>41</sub>         | 0.139  | ns                  |
| <i>VIN3-MAF4</i>   | 0.195       | 1.274 <sub>41</sub>          | 0.210  | ns                  |
| <i>MAF2-FT</i>     | 0.181       | 1.179 <sub>41</sub>          | 0.245  | ns                  |
| <i>MAF4-AGL20</i>  | 0.162       | 1.048 <sub>41</sub>          | 0.301  | ns                  |
| <i>MAF5-FT</i>     | -0.122      | -0.788 <sub>41</sub>         | 0.435  | ns                  |
| <i>VIN3-MAF5</i>   | 0.104       | 0.669 <sub>41</sub>          | 0.507  | ns                  |
| <i>VIN3-MAF2</i>   | -0.103      | -0.665 <sub>41</sub>         | 0.509  | ns                  |
| <i>MAF4-FT</i>     | -0.100      | -0.646 <sub>41</sub>         | 0.522  | ns                  |
| <i>FLC-AGL20</i>   | -0.080      | -0.513 <sub>41</sub>         | 0.610  | ns                  |
| <i>MAF5-AGL20</i>  | 0.058       | 0.373 <sub>41</sub>          | 0.711  | ns                  |
| <i>VIN3-AGL24</i>  | -0.052      | -0.334 <sub>41</sub>         | 0.740  | ns                  |
| <i>FRI-FLC</i>     | 0.023       | 0.150 <sub>41</sub>          | 0.882  | ns                  |

<sup>b</sup>T-value and degrees of freedom

<sup>c</sup>P-values were adjusted following Benjamini and Hochberg (1995). \*\*\* adjusted P-value < 0.001; \*\* adjusted P-value < 0.01; \* adjusted P-value < 0.05; ns: adjusted P-value > 0.05

**Table S8:** Effect of altitude on gene expression of vernalized plants. Linear mixed effect models were calculated separately for each gene and collection time, with altitude (linear and quadratic) and treatment as well as their interactions as fixed and genotype as random factors.

| Genes, collection   | Altitude (lin.)      |                        | Altitude (quad.)     |                  | 6 wks vern.           |                | 12 wks vern.          |                | Alt (lin.)×6 wks     |                | Alt (quad.)×6 wks    |                | Alt (lin.)×12 wks    |                | Alt(quad.)×12 wks    |                |
|---------------------|----------------------|------------------------|----------------------|------------------|-----------------------|----------------|-----------------------|----------------|----------------------|----------------|----------------------|----------------|----------------------|----------------|----------------------|----------------|
|                     | t <sub>dF</sub>      | p <sup>b</sup>         | t <sub>dF</sub>      | p <sup>b</sup>   | t <sub>dF</sub>       | p <sup>b</sup> | t <sub>dF</sub>       | p <sup>b</sup> | t <sub>dF</sub>      | p <sup>b</sup> | t <sub>dF</sub>      | p <sup>b</sup> | t <sub>dF</sub>      | p <sup>b</sup> | t <sub>dF</sub>      | p <sup>b</sup> |
| <b>AGL19, early</b> | -3.046 <sub>93</sub> | <b>0.0030</b> *        | 2.635 <sub>93</sub>  | <b>0.0099</b> *  | 15.864 <sub>93</sub>  | <0.0001 ****   | 45.109 <sub>93</sub>  | <0.0001 ****   | -1.513 <sub>93</sub> | 0.1336         | -2.012 <sub>93</sub> | 0.0471         | 0.729 <sub>93</sub>  | 0.4677         | -5.323 <sub>93</sub> | <0.0001 ****   |
| <b>AGL19, late</b>  | -4.714 <sub>90</sub> | <b>&lt;0.0001</b> **** | 1.296 <sub>90</sub>  | 0.1984           | 11.505 <sub>90</sub>  | <0.0001 ****   | 27.662 <sub>90</sub>  | <0.0001 ****   | 3.027 <sub>90</sub>  | 0.0032 *       | -2.358 <sub>90</sub> | 0.0205         | 3.284 <sub>90</sub>  | 0.0015 **      | -3.600 <sub>90</sub> | 0.0005 **      |
| AGL20, early        | -0.147 <sub>93</sub> | 0.8835                 | 1.764 <sub>93</sub>  | 0.0810           | -1.037 <sub>93</sub>  | 0.3024         | -1.180 <sub>93</sub>  | 0.2410         | -0.634 <sub>93</sub> | 0.5276         | -2.181 <sub>93</sub> | 0.0317         | 0.428 <sub>93</sub>  | 0.6698         | 0.096 <sub>93</sub>  | 0.9235         |
| AGL20, late         | 1.044 <sub>90</sub>  | 0.2991                 | 3.829 <sub>90</sub>  | <b>0.0002</b> ** | 4.163 <sub>90</sub>   | <0.0001 ***    | 7.929 <sub>90</sub>   | <0.0001 ****   | -1.778 <sub>90</sub> | 0.0788         | -1.776 <sub>90</sub> | 0.0791         | -3.553 <sub>90</sub> | 0.0006 **      | -3.375 <sub>90</sub> | 0.0011 **      |
| AGL24, early        | -0.795 <sub>93</sub> | 0.4289                 | 1.407 <sub>93</sub>  | 0.1628           | -1.429 <sub>93</sub>  | 0.1563         | 3.202 <sub>93</sub>   | 0.0019 **      | 0.365 <sub>93</sub>  | 0.7159         | -1.622 <sub>93</sub> | 0.1083         | 0.599 <sub>93</sub>  | 0.5505         | -0.518 <sub>93</sub> | 0.6059         |
| AGL24, late         | -2.248 <sub>90</sub> | 0.0270                 | -0.664 <sub>90</sub> | 0.5082           | -0.949 <sub>90</sub>  | 0.3453         | 5.043 <sub>90</sub>   | <0.0001 ****   | 2.186 <sub>90</sub>  | 0.0314         | 0.801 <sub>90</sub>  | 0.4252         | 0.570 <sub>90</sub>  | 0.5704         | 1.320 <sub>90</sub>  | 0.1903         |
| FLC, early          | 0.069 <sub>93</sub>  | 0.9453                 | 3.357 <sub>93</sub>  | <b>0.0011</b> ** | -15.095 <sub>93</sub> | <0.0001 ****   | -39.007 <sub>93</sub> | <0.0001 ****   | 0.223 <sub>93</sub>  | 0.8244         | -3.881 <sub>93</sub> | 0.0002 **      | 3.554 <sub>93</sub>  | 0.0006 **      | -0.644 <sub>93</sub> | 0.5213         |
| FLC, late           | 0.660 <sub>90</sub>  | 0.5109                 | 0.580 <sub>90</sub>  | 0.5635           | -15.903 <sub>90</sub> | <0.0001 ****   | -36.409 <sub>90</sub> | <0.0001 ****   | 1.817 <sub>90</sub>  | 0.0725         | -0.900 <sub>90</sub> | 0.3707         | 1.452 <sub>90</sub>  | 0.1499         | 2.859 <sub>90</sub>  | 0.0053 *       |
| FRI, early          | 1.276 <sub>93</sub>  | 0.2051                 | 0.796 <sub>93</sub>  | 0.4280           | 4.611 <sub>93</sub>   | <0.0001 ****   | 2.575 <sub>93</sub>   | 0.0116 *       | -1.797 <sub>93</sub> | 0.0755         | -2.009 <sub>93</sub> | 0.0474         | -0.776 <sub>93</sub> | 0.4394         | 1.045 <sub>93</sub>  | 0.2988         |
| FRI, late           | 0.848 <sub>90</sub>  | 0.3986                 | 1.603 <sub>90</sub>  | 0.1124           | 0.877 <sub>90</sub>   | 0.3827         | 5.766 <sub>90</sub>   | <0.0001 ****   | -0.198 <sub>90</sub> | 0.8434         | -3.460 <sub>90</sub> | 0.0008 **      | -1.679 <sub>90</sub> | 0.0967         | -1.928 <sub>90</sub> | 0.0570         |
| FT, early           | 0.264 <sub>93</sub>  | 0.7922                 | 0.832 <sub>93</sub>  | 0.4077           | -1.246 <sub>93</sub>  | 0.2160         | 8.259 <sub>93</sub>   | <0.0001 ****   | -1.299 <sub>93</sub> | 0.1970         | 0.674 <sub>93</sub>  | 0.5019         | -1.065 <sub>93</sub> | 0.2898         | 1.025 <sub>93</sub>  | 0.3081         |
| <b>FT, late</b>     | -4.800 <sub>89</sub> | <b>&lt;0.0001</b> **** | 2.767 <sub>89</sub>  | <b>0.0069</b> *  | 6.538 <sub>89</sub>   | <0.0001 ****   | 18.493 <sub>89</sub>  | <0.0001 ****   | 4.452 <sub>89</sub>  | <0.0001 ***    | -0.534 <sub>89</sub> | 0.5949         | 1.834 <sub>89</sub>  | 0.0699         | -0.561 <sub>89</sub> | 0.5759         |
| MAF2, early         | 2.347 <sub>93</sub>  | 0.0211                 | -0.120 <sub>93</sub> | 0.9049           | 1.146 <sub>93</sub>   | 0.2546         | -3.098 <sub>93</sub>  | 0.0026 **      | -0.881 <sub>93</sub> | 0.3807         | -1.022 <sub>93</sub> | 0.3096         | -1.999 <sub>93</sub> | 0.0486         | -0.587 <sub>93</sub> | 0.5586         |
| MAF2, late          | 1.621 <sub>90</sub>  | 0.1085                 | 1.288 <sub>90</sub>  | 0.2012           | -3.956 <sub>90</sub>  | 0.0002 ***     | -5.803 <sub>90</sub>  | <0.0001 ****   | -1.302 <sub>90</sub> | 0.1962         | -2.971 <sub>90</sub> | 0.0038 *       | -0.171 <sub>90</sub> | 0.8648         | -1.096 <sub>90</sub> | 0.2759         |
| MAF3, early         | -2.252 <sub>93</sub> | 0.0267                 | 0.783 <sub>93</sub>  | 0.4354           | -0.999 <sub>93</sub>  | 0.3202         | -11.564 <sub>93</sub> | <0.0001 ****   | -0.493 <sub>93</sub> | 0.6231         | -1.958 <sub>93</sub> | 0.0533         | 2.524 <sub>93</sub>  | 0.0133 *       | -1.421 <sub>93</sub> | 0.1587         |
| MAF3, late          | -1.230 <sub>90</sub> | 0.2219                 | 0.587 <sub>90</sub>  | 0.5587           | -4.436 <sub>90</sub>  | <0.0001 ****   | -8.521 <sub>90</sub>  | <0.0001 ****   | -0.502 <sub>90</sub> | 0.6171         | -1.474 <sub>90</sub> | 0.1439         | -3.292 <sub>90</sub> | 0.0014 **      | 1.152 <sub>90</sub>  | 0.2525         |
| MAF4, early         | -1.938 <sub>92</sub> | 0.0557                 | 3.759 <sub>92</sub>  | <b>0.0003</b> ** | -3.840 <sub>92</sub>  | 0.0002 ***     | -7.211 <sub>92</sub>  | <0.0001 ****   | 0.711 <sub>92</sub>  | 0.4791         | -4.320 <sub>92</sub> | <0.0001 ***    | 1.214 <sub>92</sub>  | 0.2279         | -4.462 <sub>92</sub> | <0.0001 ***    |
| MAF4, late          | -1.327 <sub>90</sub> | 0.1879                 | 2.014 <sub>90</sub>  | 0.0470           | -4.031 <sub>90</sub>  | 0.0001 ***     | -6.643 <sub>90</sub>  | <0.0001 ****   | -0.842 <sub>90</sub> | 0.4021         | -1.976 <sub>90</sub> | 0.0513         | -0.898 <sub>90</sub> | 0.3716         | 0.741 <sub>90</sub>  | 0.4606         |
| MAF5, early         | -0.732 <sub>92</sub> | 0.4661                 | -0.006 <sub>92</sub> | 0.9955           | 1.423 <sub>92</sub>   | 0.1582         | 1.326 <sub>92</sub>   | 0.1880         | -2.229 <sub>92</sub> | 0.0283         | 1.869 <sub>92</sub>  | 0.0647         | -2.129 <sub>92</sub> | 0.0359         | 2.210 <sub>92</sub>  | 0.0296         |
| MAF5, late          | -1.820 <sub>90</sub> | 0.0720                 | 0.972 <sub>90</sub>  | 0.3337           | -0.969 <sub>90</sub>  | 0.3350         | -0.171 <sub>90</sub>  | 0.8646         | 1.193 <sub>90</sub>  | 0.2361         | -0.656 <sub>90</sub> | 0.5134         | 2.507 <sub>90</sub>  | 0.0140 *       | -1.286 <sub>90</sub> | 0.2016         |
| <b>VIN3, early</b>  | -3.087 <sub>92</sub> | <b>0.0027</b> *        | 1.138 <sub>92</sub>  | 0.2581           | -1.522 <sub>92</sub>  | 0.1313         | -1.482 <sub>92</sub>  | 0.1418         | 1.555 <sub>92</sub>  | 0.1233         | 0.371 <sub>92</sub>  | 0.7114         | 0.059 <sub>92</sub>  | 0.9532         | -0.734 <sub>92</sub> | 0.4646         |
| VIN3, late          | -0.435 <sub>90</sub> | 0.6644                 | -0.052 <sub>90</sub> | 0.9590           | 6.105 <sub>90</sub>   | <0.0001 ****   | 10.472 <sub>90</sub>  | <0.0001 ****   | -0.696 <sub>90</sub> | 0.4881         | 0.612 <sub>90</sub>  | 0.5422         | -2.677 <sub>90</sub> | 0.0088 *       | 1.060 <sub>90</sub>  | 0.2922         |

<sup>b</sup> original p-values are shown in this table. These were then corrected for multiple testing following Benjamini and Hochberg (1995) separately for each factor. Asterisks denote the significance of these adjusted p-values. \* : adjusted p-value < 0.05; \*\* : adjusted p-value < 0.01; \*\*\* : adjusted p-value < 0.001; \*\*\*\* : adjusted p-value < 0.0001

**Table S9:** Gene regulatory network analysis show that some edges could be associated with altitude. However, after adjusting for multiple testing, none of the effects remained significant.

| <b>Gene 1</b> | <b>Gene 2</b> | <b>Correlation</b> | <b>T<sub>df</sub><sup>b</sup></b> | <b>P</b> | <b>P adj.<sup>c</sup></b> |
|---------------|---------------|--------------------|-----------------------------------|----------|---------------------------|
| FT            | AGL20         | -0.722             | -3.464 <sub>11</sub>              | 0.0053   | 0.1059                    |
| MAF5          | AGL20         | 0.497              | 1.901 <sub>11</sub>               | 0.0838   | 0.4503                    |
| VIN3          | MAF5          | 0.495              | 1.888 <sub>11</sub>               | 0.0857   | 0.4503                    |
| FLC           | AGL20         | 0.484              | 1.835 <sub>11</sub>               | 0.0937   | 0.4503                    |
| MAF4          | AGL20         | 0.428              | 1.570 <sub>11</sub>               | 0.1448   | 0.4503                    |
| VIN3          | MAF2          | 0.415              | 1.513 <sub>11</sub>               | 0.1584   | 0.4503                    |
| AGL20         | AGL24         | -0.397             | -1.433 <sub>11</sub>              | 0.1796   | 0.4503                    |
| VIN3          | AGL19         | -0.396             | -1.431 <sub>11</sub>              | 0.1801   | 0.4503                    |
| MAF3          | AGL20         | 0.385              | 1.319 <sub>10</sub>               | 0.2164   | 0.4810                    |
| MAF2          | FT            | -0.283             | -0.977 <sub>11</sub>              | 0.3494   | 0.6989                    |
| VIN3          | FLC           | 0.224              | 0.763 <sub>11</sub>               | 0.4617   | 0.7394                    |
| FLC           | FT            | 0.222              | 0.754 <sub>11</sub>               | 0.4667   | 0.7394                    |
| FRI           | FLC           | -0.215             | -0.730 <sub>11</sub>              | 0.4806   | 0.7394                    |
| VIN3          | AGL24         | -0.191             | -0.645 <sub>11</sub>              | 0.5322   | 0.7603                    |
| VIN3          | MAF3          | 0.163              | 0.523 <sub>10</sub>               | 0.6126   | 0.8158                    |
| VIN3          | MAF4          | 0.110              | 0.367 <sub>11</sub>               | 0.7209   | 0.8158                    |
| MAF5          | FT            | -0.103             | -0.342 <sub>11</sub>              | 0.7385   | 0.8158                    |
| MAF3          | FT            | -0.095             | -0.303 <sub>11</sub>              | 0.7683   | 0.8158                    |
| MAF4          | FT            | 0.088              | 0.293 <sub>11</sub>               | 0.7750   | 0.8158                    |
| MAF2          | AGL20         | 0.070              | 0.233 <sub>11</sub>               | 0.8200   | 0.8200                    |

<sup>b</sup>T-value and degrees of freedom

<sup>c</sup>P-values were adjusted following Benjamini and Hochberg (1995)

**Table S10:** Environmental parameters for all original collection sites, extrapolated with interpolated GIS data (ARCMAP 10; ESRI). Genotype E001 and E003 (in italic) were excluded from analyses.

| Altitude | Genotype    | Yearly precipitation | Yearly solar radiation | Average winter temperature | Average summer temperature | Average yearly temperature | Maximal winter temperature | Maximal summer temperature | Maximal yearly temperature | Minimal winter temperature | Minimal summer temperature | Minimal yearly temperature | Habitat exposition | Habitat slope |
|----------|-------------|----------------------|------------------------|----------------------------|----------------------------|----------------------------|----------------------------|----------------------------|----------------------------|----------------------------|----------------------------|----------------------------|--------------------|---------------|
| 800      | <i>E001</i> | 12503                | 15731                  | 2.02                       | 12.35                      | 7.18                       | 6.16                       | 17.92                      | 12.04                      | -1.21                      | 8.19                       | 3.49                       | 7                  | 9             |
| 850      | E002        | 7771                 | 17429                  | 2.40                       | 13.01                      | 7.70                       | 6.65                       | 19.32                      | 12.98                      | -1.35                      | 8.19                       | 3.42                       | 190                | 11            |
| 900      | <i>E003</i> | 7320                 | 11197                  | 2.93                       | 13.64                      | 8.28                       | 6.91                       | 19.76                      | 13.34                      | -1.24                      | 8.33                       | 3.54                       | 286                | 17            |
| 1000     | E004        | 8261                 | 22824                  | 2.08                       | 12.57                      | 7.32                       | 6.40                       | 18.91                      | 12.65                      | -1.73                      | 7.74                       | 3.01                       | 210                | 38            |
| 1030     | E005        | 8743                 | 17947                  | 1.78                       | 12.23                      | 7.00                       | 5.91                       | 18.11                      | 12.01                      | -2.03                      | 7.35                       | 2.66                       | 128                | 23            |
| 1360     | E006        | 15503                | 19286                  | -0.33                      | 9.80                       | 4.73                       | 4.14                       | 15.15                      | 9.64                       | -3.38                      | 5.65                       | 1.14                       | 175                | 16            |
| 2040     | E007        | 10407                | 21887                  | -4.13                      | 6.07                       | 0.97                       | 0.80                       | 11.31                      | 6.05                       | -8.39                      | 1.52                       | -3.44                      | 189                | 21            |
| 1719     | E008        | 8280                 | 16834                  | -1.32                      | 8.33                       | 3.50                       | 2.91                       | 13.29                      | 8.10                       | -4.73                      | 4.15                       | -0.29                      | 65                 | 18            |
| 1850     | E009        | 10631                | 14401                  | -2.84                      | 6.36                       | 1.75                       | 1.25                       | 10.65                      | 5.95                       | -6.31                      | 2.21                       | -2.05                      | 318                | 28            |
| 2012     | E011        | 10064                | 19986                  | -2.84                      | 6.41                       | 1.78                       | 0.86                       | 10.10                      | 5.48                       | -6.58                      | 1.93                       | -2.32                      | 93                 | 47            |
| 2700     | E012        | 14172                | 22404                  | -5.57                      | 2.88                       | -1.34                      | -1.47                      | 6.34                       | 2.43                       | -8.42                      | -0.49                      | -4.46                      | 258                | 34            |
| 1368     | E014        | 15550                | 18899                  | -0.36                      | 9.77                       | 4.70                       | 4.07                       | 15.05                      | 9.56                       | -3.44                      | 5.58                       | 1.07                       | 176                | 12            |
| 1730     | E015        | 8359                 | 16834                  | -1.34                      | 8.31                       | 3.48                       | 2.81                       | 13.13                      | 7.97                       | -4.82                      | 4.05                       | -0.39                      | 65                 | 18            |
| 1792     | E016        | 8615                 | 16619                  | -1.55                      | 8.05                       | 3.24                       | 2.71                       | 12.97                      | 7.84                       | -4.92                      | 3.93                       | -0.49                      | 113                | 6             |
| 1949     | E017        | 9394                 | 17179                  | -1.97                      | 7.51                       | 2.76                       | 2.25                       | 12.25                      | 7.25                       | -5.35                      | 3.41                       | -0.97                      | 88                 | 29            |
